# Supplementary material for: A collection of genetic mouse lines and related tools for inducible and reversible intersectional misexpression
Source: Oxford University Press journal article supplement (doi:10.1242/dev.186650), 2020-01-01
Supplement: dev186650supp.pdf [file dev186650supp.pdf]

## SUPPLEMENTARY FIGURES

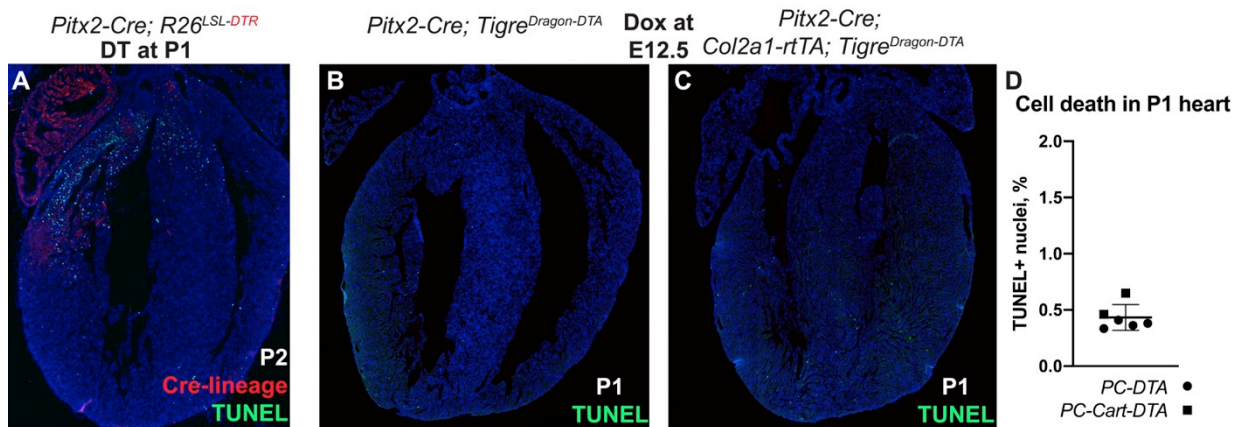

**Figure U1. The intersectional approach allows sparing of unwanted cell populations, such as cardiomyocytes when using *Pitx2-Cre*.** A) Representative image showing the cell death distribution (TUNEL) in the P2 heart when diphtheria toxin receptor (DTR, red) is activated by *Pitx2-Cre* and DT is injected at P1 (modified from (Rosello-Diez et al., 2017), subject to a free-distribution license). B, C) Negligible cell death is observed in the hearts of P1 *PC-DTA* (B) and *PC-Cart-DTA* (C), with Dox provided at E12.5. D) Quantification of cell death in *PC-DTA* and *PC-Cart-DTA* hearts (mean±SD, n=4 and 2 respectively).

**Table S1. Reagents and resources**

| REAGENT or RESOURCE                                                 | SOURCE                                    | IDENTIFIER                  |
|---------------------------------------------------------------------|-------------------------------------------|-----------------------------|
| <b>Antibodies</b>                                                   |                                           |                             |
| Rat monoclonal anti-mCherry                                         | ThermoFisher                              | M11217; RRID:AB_2536611     |
| Rabbit polyclonal anti-p21                                          | Santa Cruz Biotechnology                  | M19; RRID:AB_632123         |
| Mouse monoclonal anti-NeuN                                          | Millipore                                 | MAB377;RRID:AB_2298772      |
| Rabbit polyclonal anti-MEIS2                                        | <a href="#">Mercader et al., 2005</a>     | N/A                         |
| Goat anti-rat IgG (H+L) Cross-Adsorbed, AlexaFluor 555              | ThermoFisher                              | A-21434; RRID:AB_141733     |
| Donkey anti-mouse IgG (H+L), Highly Cross-Adsorbed, AlexaFluor 488  | ThermoFisher                              | A-21202; RRID:AB_141607     |
| Donkey anti-rabbit IgG (H+L), Highly Cross-Adsorbed, AlexaFluor 647 | ThermoFisher                              | A-31573; RRID:AB_2536183    |
| Anti-Digoxigenin-AP Fab fragments                                   | Sigma-Aldrich                             | 11093274910; RRID:AB_514497 |
| <b>Chemicals, recombinant proteins</b>                              |                                           |                             |
| Paraformaldehyde (powder)                                           | Sigma-Aldrich                             |                             |
| Triton X-100                                                        | Sigma-Aldrich                             | T9284-500ML                 |
| Fluoromount aqueous mounting medium                                 | Sigma-Aldrich                             | F4680-25ml                  |
| 40,6-diamidino-2-phenylindole (DAPI)                                | ThermoFisher                              | D1306                       |
| SYTOX green                                                         | ThermoFisher                              | S7020                       |
| Doxycycline hyclate                                                 | Sigma-Aldrich                             | D9891-10 gr                 |
| Affigel blue beads                                                  | Biorad                                    | 1537301                     |
| Biotin 16-dUTP                                                      | Sapphire Bioscience                       | JBS-NU-803-BIO16-S          |
| TAT-Cre                                                             | Millipore                                 | SCR-508                     |
| Terminal transferase recombinant                                    | Merck                                     | 3333566001                  |
| <b>Electroporation tools</b>                                        |                                           |                             |
| Platinum wire, 0.25 mm                                              | SDR Scientific                            | 711000                      |
| Tungsten wire, 0.5 mm                                               | Sigma-Aldrich                             | 356972                      |
| Pulse generator and amplifier                                       | Intracel                                  | TSS20                       |
| Glass capillaries                                                   | Harvard apparatus                         | GC120T-10                   |
| <b>Experimental Models: Organisms/Strains</b>                       |                                           |                             |
| Mouse <i>Tigre</i> <sup>Dragon-p21</sup>                            | <a href="#">Rosello-Diez et al., 2018</a> | RRID:IMSR_JAX:034777        |
| Mouse <i>Tigre</i> <sup>TRE-p21</sup>                               | This paper                                | N/A                         |
| Mouse <i>Tigre</i> <sup>Dragon-DTA</sup>                            | This paper                                | RRID:IMSR_JAX:034778        |
| Mouse <i>Tigre</i> <sup>Dragon-Ctgf</sup>                           | This paper                                | RRID:IMSR_JAX:034779        |
| Mouse B6.Cg-Gt(ROSA)26Sortm1.1 (CAG-rtTA3)Slowe/LdowJ               | <a href="#">Dow et al., 2014</a>          | RRID:IMSR_JAX:029627        |
| Mouse <i>Atoh1-tTA</i>                                              | <a href="#">Willett et al., 2019</a>      | N/A                         |
| Mouse <i>TetO-Cre</i>                                               | <a href="#">Perl et al., 2002</a>         | RRID:IMSR_JAX:006234        |
| Mouse <i>En1-Cre</i>                                                | <a href="#">Kimmel et al., 2000</a>       | RRID:IMSR_JAX:007916        |
| Mouse <i>Col2a1-tTA</i>                                             | <a href="#">Rosello-Diez et al., 2018</a> | N/A                         |

|                                                      |                                           |                     |
|------------------------------------------------------|-------------------------------------------|---------------------|
| B6C3(129)-Tg(Pitx2ASE-cre)16Hmd/HmdRbrc Mus musculus | <a href="#">Shiratori et al., 2006</a>    | RRID:IMSR_RBRC03487 |
| Tg(Col2a1-rtTA)1Jath                                 | <a href="#">Posey et al., 2009</a>        | RRID:MGI:4361029    |
| <b>Plasmids</b>                                      |                                           |                     |
| pDragon-p21                                          | <a href="#">Rosello-Diez et al., 2018</a> | RRID:Addgene_140894 |
| pDragon-DTA                                          | This paper                                | RRID:Addgene_140895 |
| pDragon-Ctgf                                         | This paper                                | RRID:Addgene_140896 |
| pPB-CA-rtTA-Adv                                      | Addgene                                   | RRID:Addgene_20910  |
| pPB-CAG-rtTA-IRES-Hygro                              | Addgene                                   | RRID:Addgene_102423 |
| pT2-CAG-H2B-TagBFP                                   | <a href="#">Sieiro et al., 2016</a>       | N/A                 |
| pCAGGs-rtTA-IRES-Cre                                 | This paper                                | AR98                |
| Ai62(TITL-tdT) Flp-in replacement vector             | <a href="#">Madisen et al., 2015</a>      | RRID:Addgene_61576  |

**Table U2. Primers and PCR conditions used for genotyping**

| Allele        | Program                                                                                                                                 | Primer name                 | Primer sequence (5' to 3')                                             |
|---------------|-----------------------------------------------------------------------------------------------------------------------------------------|-----------------------------|------------------------------------------------------------------------|
| Cre           | 94°C 2', 33x(94°C 20", 60°C 20", 72°C 30"), 72°C 5', 10°C forever)                                                                      | Cre F<br>Cre R              | GCGGTCTGGCAGTAAAACTATC<br>GTGAAACAGCATTGCTGTCCTT                       |
| Dragon<br>WT  | 94°C 2', 33x(94°C 20", 55°C 20", 72°C 30"), 72°C 5', 10°C forever)                                                                      | Dragon F<br>Dragon R WT     | CCCAACGGTCACTTACTTCC<br>CACACCTTTAATCCCGATGC                           |
| Dragon<br>Mut | 94°C 2', 10x(94°C 20", 65°C-0.5/cycle 15", 68°C 10"), 72°C 5', 10°C forever), 28x(94°C 15", 60°C 15", 72°C 10"), 72°C 2', 10°C forever) | Dragon F<br>Dragon R Mut    | CCCAACGGTCACTTACTTCC<br>GGTAACCGCGGCATAAAAC                            |
| p21rec        | 94°C 2', 33x(94°C 20", 55°C 20", 72°C 30"), 72°C 5', 10°C forever)                                                                      | Pmin F<br>WPRE Rev          | AGTGAACCGTCAGATCGC<br>GCGTATCCACATAGCGTAAAAG                           |
| Col2-<br>rtTA | 94°C 2', 33x(94°C 20", 61°C 20", 72°C 30"), 72°C 5', 10°C forever),                                                                     | rtTA F<br>rtTA R            | ATGCCCTTGGAATTGACGAGTACGG<br>CGAGGCTTGCAGGATCATAATCAG                  |
| Col2-<br>tTA  | 94°C 2', 33x(94°C 20", 55°C 20", 72°C 30"), 72°C 5', 10°C forever)                                                                      | Col2a1 F<br>tTA R           | CCAGGGTTTCCTTGATGATG<br>GCTACTTGATGCTCCTGATCCTCC                       |
| CAG-<br>rtTA3 | 94°C 2', 33x(94°C 20", 55°C 20", 72°C 30"), 72°C 5', 10°C forever)                                                                      | Mut F<br>Common Rev<br>WT F | AAAGTCGCTCTGAGTTGTTAT<br>GCGAAGAGTTTGTCTCAACC<br>GGAGCGGGAGAAATGGATATG |
